CORRECTION

# Correction: A Computerized Test of Design Fluency

The PLOS ONE Staff

In Table 2, the rows "Experiment," "Exp. 1," "Exp. 2/3," and "Exp. 4" are erroneously duplicated within the table. Please see the correct [Table 2](#) here. The publisher apologizes for the error.

**Table 2. Participant characteristics.**

| Experiment | Group                | N     | Ages (yrs)         | Education (yrs)   | C-use scale | Male (%) |
|------------|----------------------|-------|--------------------|-------------------|-------------|----------|
| Exp. 1     | Control/ Normative   | 180   | 18–82; 41.6 (21.4) | 10–20; 14.6(2.1)  | 5.09        | 59%      |
| Exp. 2/3   | Control/ Malingering | 55/52 | 18–46; 26.2 (5.5)  | 12–18; 14.8 (1.4) | 5.86        | 51%      |
| Exp.4      | mTBI                 | 24    | 20–61; 34.1(11.5)  | 10–18; 13.5(1.4)  | 5.04        | 100%     |
|            | sTBI                 | 4     | 35–52;45.0(7.1)    | 12–16; 13.0(1.2)  | 5.25        | 75%      |

C-use = computer-use scale; mTBI = mild TBI. sTBI = severe TBI. Range, mean, and variance are shown for age and education.

doi:10.1371/journal.pone.0158933.t001

## Reference

1. Woods DL, Wyma JM, Herron TJ, Yund EW (2016) A Computerized Test of Design Fluency. PLoS ONE 11(5): e0153952. doi: [10.1371/journal.pone.0153952](https://doi.org/10.1371/journal.pone.0153952) PMID: [27138985](https://pubmed.ncbi.nlm.nih.gov/27138985/)

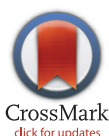

## OPEN ACCESS

**Citation:** The PLOS ONE Staff (2016) Correction: A Computerized Test of Design Fluency. PLoS ONE 11(7): e0158933. doi:10.1371/journal.pone.0158933

**Published:** July 5, 2016

**Copyright:** © 2016 The PLOS ONE Staff. This is an open access article distributed under the terms of the [Creative Commons Attribution License](#), which permits unrestricted use, distribution, and reproduction in any medium, provided the original author and source are credited.
